# Supplementary material for: Wound Depth Measurement System in Forensic Case using Image Processing and Machine Learning
Source: Research Square preprint supplement (doi:10.21203/rs.3.rs-5406106/v1), 2024-11-25
Supplement: Supplementary file 1 [file 3b3f8419a312b2ce571f298e.docx]

**Table 1**

| Data Training | Total | Data Testing | Total |
| --- | --- | --- | --- |
| Stage 2 | 36 | Stage 2 | 8 |
| Stage 3 | 12 | Stage 3 | 6 |
| Stage 4 | 28 | Stage 4 | 6 |

**Table 2**

| Wound Stage | H | S | L | A | B |
| --- | --- | --- | --- | --- | --- |
| Stage 2 | 0.15 | 0.45 | 0.60 | 0.30 | 0.20 |
| Stage 3 | 0.25 | 0.50 | 0.50 | 0.35 | 0.25 |
| Stage 4 | 0.35 | 0.55 | 0.40 | 0.40 | 0.30 |

**Table 3**

| Wound Stage | Overall Accuracy | F1-Score | Precision | Recall |
| --- | --- | --- | --- | --- |
| Stage 2 | 85% | 0.94 | 1.00 | 0.89 |
| Stage 3 | 0.77 | 0.71 | 0.83 |
| Stage 4 | 0.80 | 0.80 | 0.80 |

**Table 4**

| Wound Stage | Accuracy | F1-Score | Precision | Recall |
| --- | --- | --- | --- | --- |
| SVM | 85% | 0.93 | 1.00 | 0.89 |
| Decision Tree | 50% | 0.51 | 0.51 | 0.50 |
| Logistic Regression | 70% | 0.77 | 0.71 | 0.83 |

**Table 5**

| No. | Aspects | Our System | (Shaik et al., 2015) | (Reiter et al., 2006) |
| --- | --- | --- | --- | --- |
| 1 | Accuracy | The accuracy of wound depth measurement reaches 85% | The accuracy of wound depth measurement reaches 80% | The accuracy of wound depth measurement reaches 70% |
| 2 | Flexibility | The measurement results are not affected by the distance from which the images are taken | The measurement results are not affected by the distance from which the images are taken | The measurement results are not affected by the distance from which the images are taken |
| 3 | Application | On the wound object | On the skin object | On the face object |
| 4 | Method | Color Manipulation | Color Manipulation | 3D Reconstruction |

**Table 6**

| Image | Actual Stage | Prediction Stage | Result |
| --- | --- | --- | --- |
| 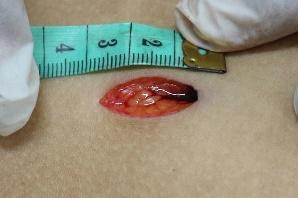 | Stage 4 | Stage 4 | Correctly Classified |
| 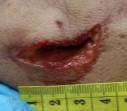 | Stage 3 | Stage 4 | Misclassified |
